# Supplementary material for: Experimental and Theoretical Biological Probing of Schiff Bases as Esterase Inhibitors: Structural, Spectral and Molecular Insights
Source: MDPI journal article supplement (doi:10.3390/molecules28155703), 2023-07-28

# Experimental and Theoretical Biological Probing of Schiff Bases as Esterase Inhibitors: Structural, Spectral and Molecular Insights

Muhammad Asam Raza <sup>1,\*</sup>, Muhammad Waseem Mumtaz <sup>1</sup>, Seyhan Öztürk <sup>2</sup>, Muhammad Latif <sup>3,4</sup>, Aisha <sup>1</sup>, Adnan Ashraf <sup>5</sup>, Necmi Dege <sup>6</sup>, Onur Erman Dogan <sup>2</sup>, Erbil Agar <sup>2</sup>, Shafiq Ur Rehman <sup>7</sup> and Awal Noor <sup>8,\*</sup>

<sup>1</sup> Department of Chemistry, Hafiz Hayat Campus, University of Gujrat, Gujrat 50700, Pakistan; muhammad.waseem@uog.edu.pk (M.W.M.); aishafatima408@gmail.com (A.)

<sup>2</sup> Department of Chemistry, Faculty of Sciences, Ondokuz Mayıs University, Samsun 55139, Türkiye; sturna@omu.edu.tr (S.Ö.); oedogan@omu.edu.tr (O.E.D.); erbagar@omu.edu.tr (E.A.)

<sup>3</sup> Department of Biochemistry and Molecular Medicine, College of Medicine, Taibah University, Madinah 42318, Saudi Arabia

<sup>4</sup> Centre for Genetics and Inherited Diseases (CGID), Taibah University, Madinah 42318, Saudi Arabia

<sup>5</sup> Department of Chemistry, University of Lahore, Lahore 54000, Pakistan; adnan.ashraf@chem.uol.edu.pk

<sup>6</sup> Department of Physics, Faculty of Sciences, Ondokuz Mayıs University, Samsun 55139, Türkiye; necmi.dege@omu.edu.tr

<sup>7</sup> Department of Chemistry, University of Central Punjab, Lahore 54590, Pakistan; shafiqchemist@gmail.com

<sup>8</sup> Department of Basic Sciences, Preparatory Year Deanship, King Faisal University, Al Hassa 31982, Saudi Arabia

\* Correspondence: asamgcu@yahoo.com (M.A.R.); anoor@kfu.edu.sa (A.N.)

## Supplementary Data

Figure S1: UV/VIS spectrum of **1**

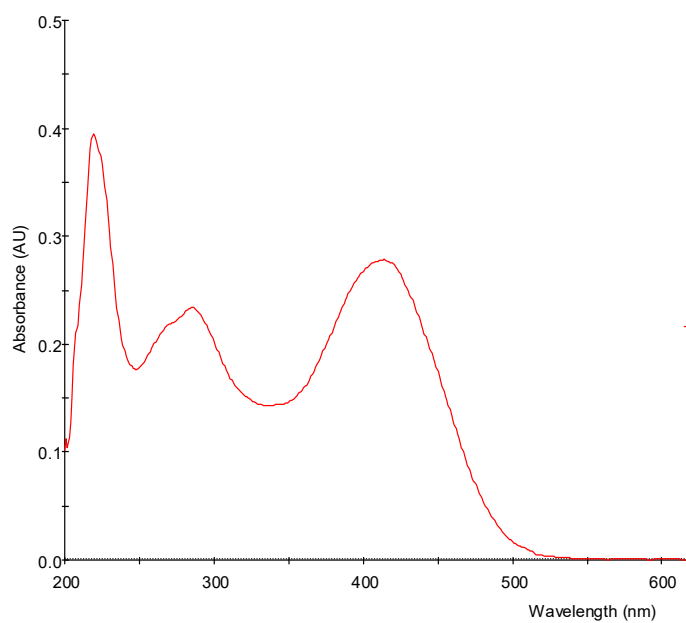

Figure S2: UV/VIS spectrum of **2**

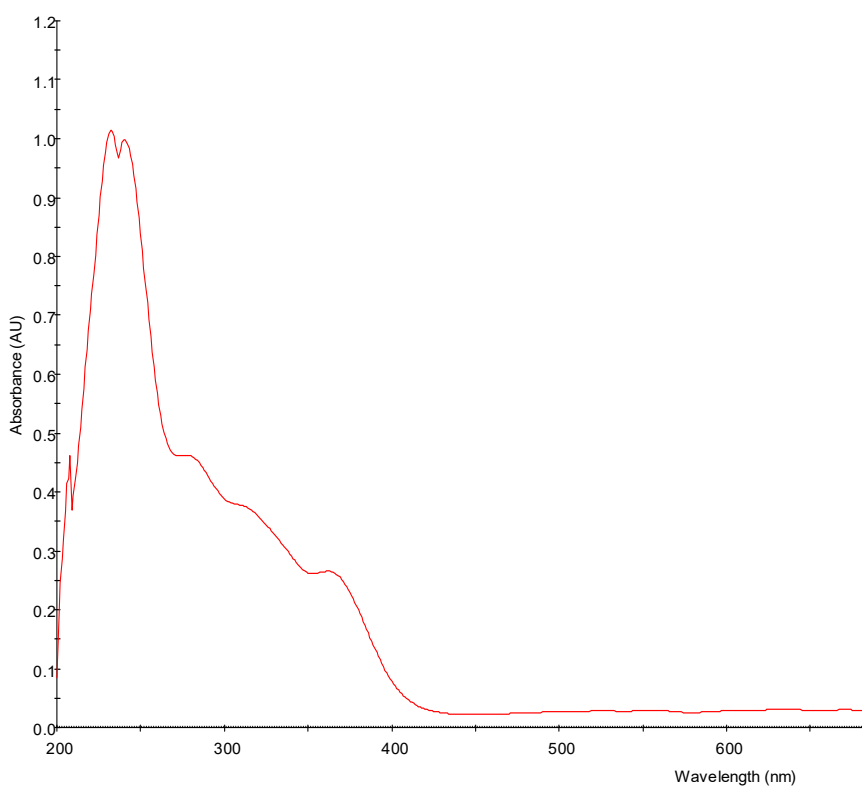

Figure S3: FTIR spectrum of **1**

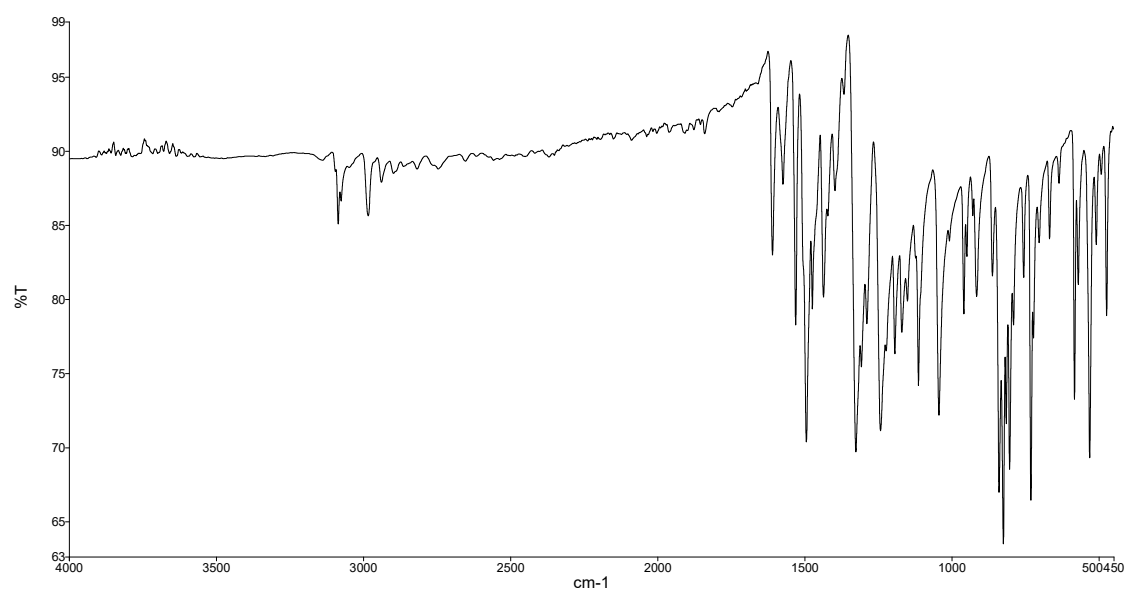

Figure S4: FTIR spectrum of **2**

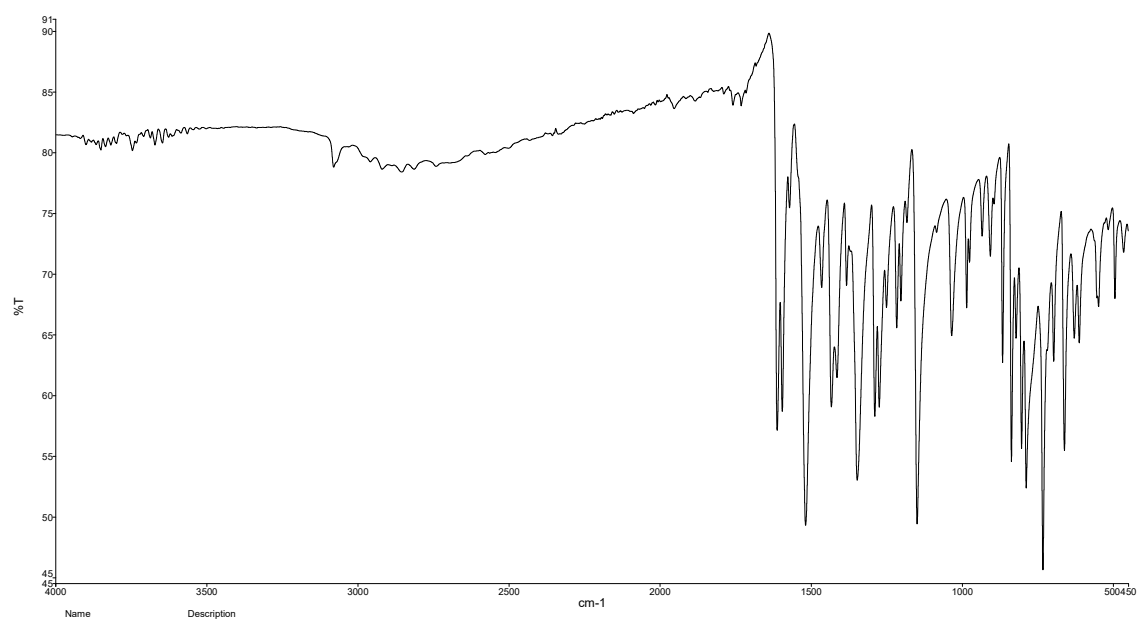

Figure S5:  $^1\text{H}$  NMR spectrum of **1**

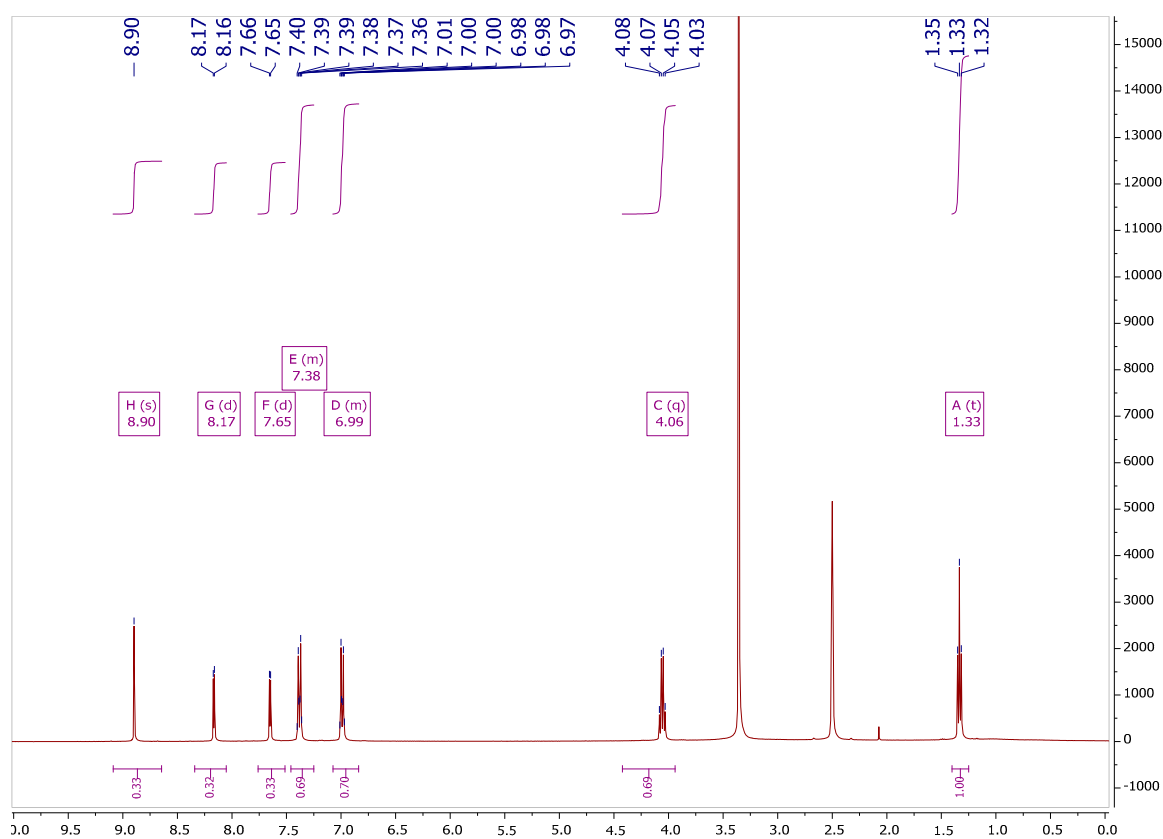

Figure S6:  $^1\text{H}$  NMR spectrum of **2**

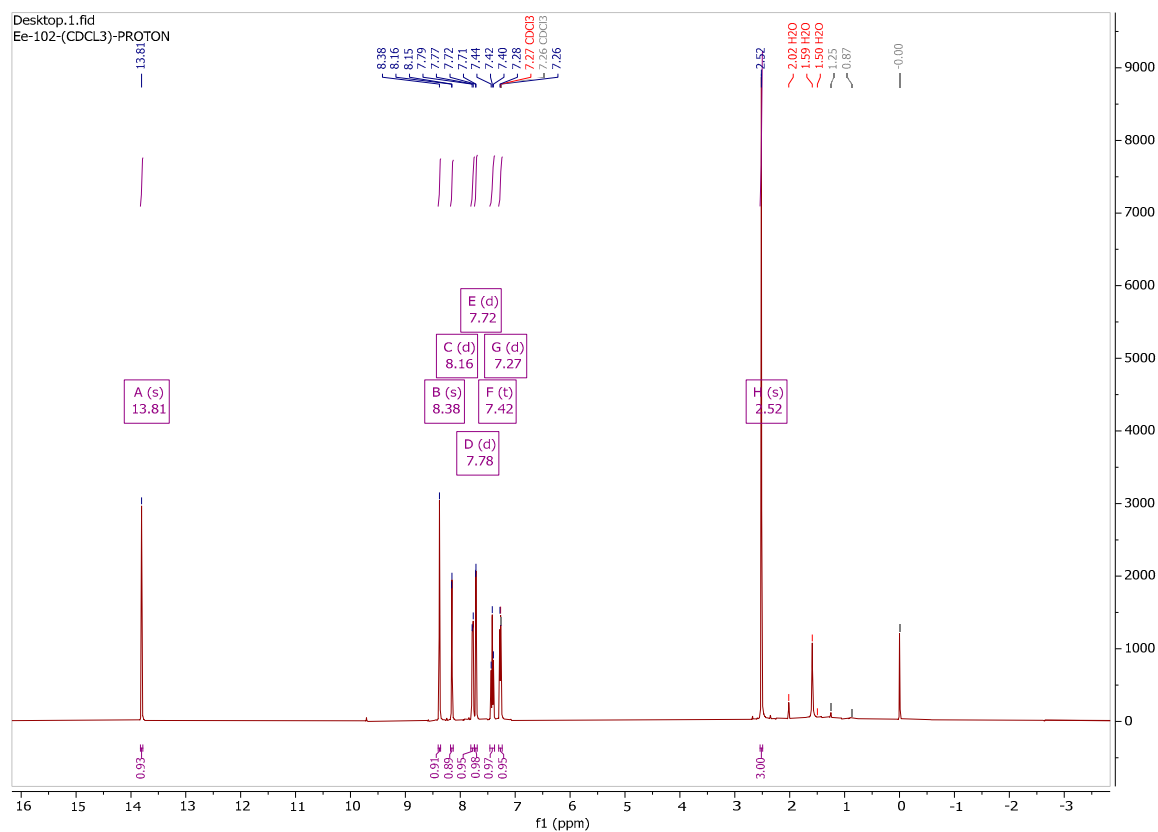

Figure S7:  $^{13}\text{C}$  NMR spectrum of **1**

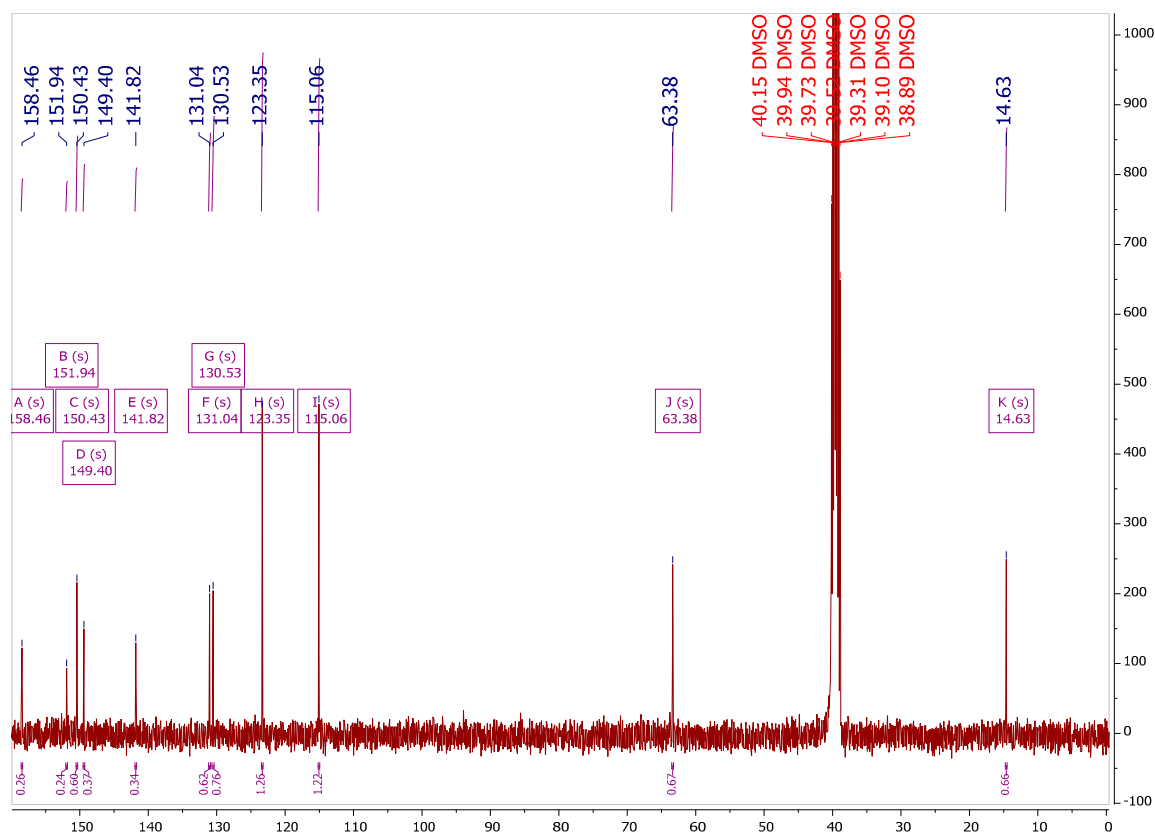

Figure S8:  $^{13}\text{C}$  NMR spectrum of **2**

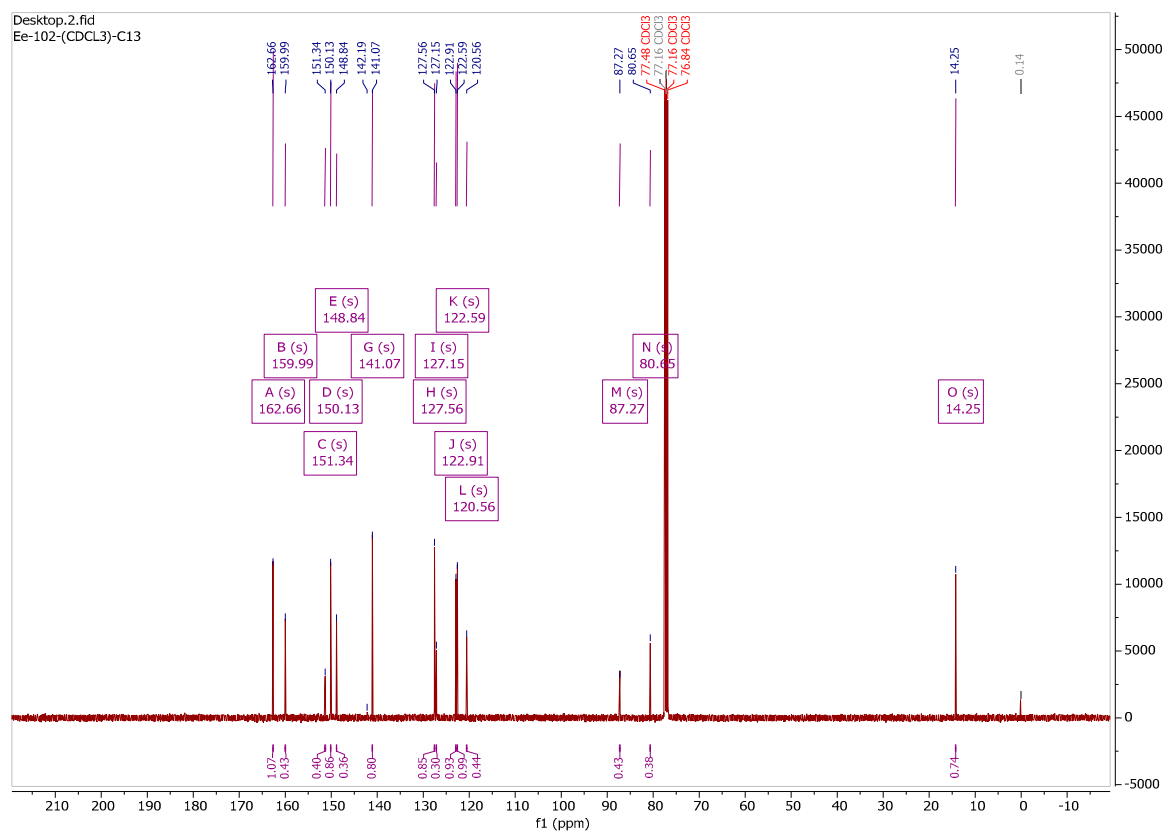

**Table S1**

**Fractional Atomic Coordinates ( $\times 10^4$ ) and Equivalent Isotropic Displacement Parameters ( $\text{\AA}^2 \times 10^3$ ) for 1.  $U_{\text{eq}}$  is defined as 1/3 of the trace of the orthogonalised  $U_{ij}$  tensor.**

| <b>Atom</b> | <b><i>x</i></b> | <b><i>y</i></b> | <b><i>z</i></b> | <b><math>U(\text{eq})</math></b> |
|-------------|-----------------|-----------------|-----------------|----------------------------------|
| S1          | 7903.9 (7)      | 3758.3 (6)      | 7595.1 (9)      | 52.6 (3)                         |
| O3          | 3095.7 (19)     | 3840.3 (16)     | -2167 (2)       | 53.2 (6)                         |
| N2          | 6313 (2)        | 3890.1 (18)     | 4047 (3)        | 47.8 (6)                         |
| O2          | 10704 (3)       | 3776 (3)        | 11047 (4)       | 97.2 (11)                        |
| N1          | 9685 (3)        | 3732 (2)        | 10383 (3)       | 67.2 (8)                         |
| C9          | 3940 (3)        | 3829 (2)        | -695 (3)        | 43.9 (6)                         |
| C6          | 5531 (3)        | 3870 (2)        | 2430 (3)        | 45.6 (7)                         |
| O1          | 8931 (3)        | 3669 (3)        | 11171 (3)       | 101.4 (12)                       |
| C10         | 3666 (3)        | 4273 (2)        | 708 (4)         | 50.5 (7)                         |
| C8          | 4998 (3)        | 3393 (2)        | -530 (3)        | 51.2 (7)                         |
| C7          | 5787 (3)        | 3410 (2)        | 1022 (4)        | 51.5 (7)                         |
| C11         | 4453 (3)        | 4283 (2)        | 2253 (3)        | 49.3 (7)                         |
| C5          | 7373 (3)        | 3892 (2)        | 4077 (4)        | 54.3 (8)                         |
| C4          | 8262 (3)        | 3845 (2)        | 5652 (4)        | 50.4 (7)                         |
| C12         | 3381 (3)        | 3405 (3)        | -3636 (3)       | 54.8 (8)                         |
| C1          | 9335 (3)        | 3762 (2)        | 8562 (4)        | 53.7 (8)                         |
| C13         | 2328 (3)        | 3420 (3)        | -5068 (4)       | 65.5 (9)                         |
| C2          | 10061 (3)       | 3817 (3)        | 7481 (4)        | 64.2 (9)                         |
| C3          | 9415 (3)        | 3862 (3)        | 5788 (4)        | 62.6 (9)                         |

Table S2

Anisotropic Displacement Parameters ( $\text{\AA}^2 \times 10^3$ ) for 1. The Anisotropic displacement factor exponent takes the form:  $-2\pi^2[h^2a^{*2}U_{11}+2hka^*b^*U_{12}+...]$ .

| Atom | U <sub>11</sub> | U <sub>22</sub> | U <sub>33</sub> | U <sub>12</sub> | U <sub>13</sub> | U <sub>23</sub> |
|------|-----------------|-----------------|-----------------|-----------------|-----------------|-----------------|
| S1   | 44.6 (5)        | 68.5 (5)        | 45.2 (4)        | 1.8 (4)         | 11.6 (3)        | -5.0 (3)        |
| O3   | 49.2 (13)       | 66.0 (14)       | 41.8 (10)       | 8.9 (10)        | 5.3 (9)         | -4.0 (9)        |
| N2   | 47.6 (16)       | 52.7 (15)       | 40.9 (12)       | -0.2 (11)       | 5.9 (10)        | 3.7 (9)         |
| O2   | 70 (2)          | 154 (3)         | 56.3 (15)       | 3.3 (19)        | -8.5 (13)       | -10.4 (15)      |
| N1   | 64 (2)          | 92 (2)          | 43.5 (14)       | 3.2 (16)        | 7.5 (13)        | -9.1 (13)       |
| C9   | 46.1 (16)       | 44.4 (15)       | 39.9 (13)       | 3.1 (12)        | 6.9 (11)        | 2.0 (10)        |
| C6   | 46.2 (17)       | 49.0 (16)       | 40.6 (13)       | 0.9 (12)        | 8.1 (11)        | 5.2 (11)        |
| O1   | 85 (2)          | 174 (4)         | 49.9 (14)       | -1 (2)          | 24.6 (14)       | -7.2 (16)       |
| C10  | 42.8 (17)       | 58.8 (18)       | 49.9 (15)       | 6.7 (14)        | 10.5 (12)       | -6.1 (13)       |
| C8   | 52.3 (18)       | 59.4 (17)       | 41.1 (13)       | 11.4 (14)       | 9.2 (12)        | -5.4 (12)       |
| C7   | 47.5 (17)       | 55.7 (17)       | 50.0 (15)       | 12.3 (14)       | 8.1 (12)        | -1.7 (12)       |
| C11  | 46.4 (17)       | 60.0 (18)       | 41.9 (14)       | 3.0 (13)        | 10.7 (12)       | -3.9 (12)       |
| C5   | 53 (2)          | 65 (2)          | 45.1 (15)       | -1.0 (14)       | 10.9 (13)       | -0.0 (12)       |
| C4   | 48.9 (18)       | 59.5 (18)       | 41.7 (14)       | 3.2 (13)        | 7.8 (12)        | -1.6 (12)       |
| C12  | 57 (2)          | 66 (2)          | 40.9 (14)       | 5.9 (15)        | 10.6 (12)       | -3.8 (13)       |
| C1   | 48.7 (18)       | 69.1 (19)       | 41.6 (14)       | 1.1 (15)        | 7.0 (12)        | -5.9 (13)       |
| C13  | 60 (2)          | 81 (2)          | 50.5 (17)       | 6.5 (18)        | 2.5 (15)        | -11.0 (15)      |
| C2   | 45.1 (19)       | 94 (3)          | 51.8 (17)       | 2.0 (17)        | 7.5 (14)        | -2.8 (16)       |
| C3   | 49.0 (19)       | 90 (3)          | 50.0 (17)       | -0.1 (17)       | 13.9 (13)       | 2.3 (15)        |

Table S3

Torsion Angles for 1.

| A  | B  | C   | D   | Angle/°    | A  | B   | C   | D   | Angle/°    |
|----|----|-----|-----|------------|----|-----|-----|-----|------------|
| S1 | C4 | C5  | N2  | 1.4 (3)    | N2 | C6  | C11 | C10 | -179.5 (3) |
| S1 | C4 | C3  | C2  | -0.7 (3)   | N2 | C5  | C4  | C3  | -178.7 (3) |
| S1 | C1 | N1  | O2  | -176.9 (3) | O2 | N1  | C1  | C2  | 1.4 (5)    |
| S1 | C1 | N1  | O1  | 2.7 (4)    | N1 | C1  | C2  | C3  | -178.2 (4) |
| S1 | C1 | C2  | C3  | 0.2 (3)    | C9 | C10 | C11 | C6  | 1.2 (4)    |
| O3 | C9 | C10 | C11 | 178.8 (3)  | C9 | C8  | C7  | C6  | -0.5 (4)   |
| O3 | C9 | C8  | C7  | -179.0 (3) | C5 | C4  | C3  | C2  | 179.3 (4)  |
| N2 | C6 | C7  | C8  | 179.1 (3)  | C4 | C3  | C2  | C1  | 0.3 (4)    |

**Table S4****Hydrogen Atom Coordinates ( $\text{\AA}\times 10^4$ ) and Isotropic Displacement Parameters ( $\text{\AA}^2\times 10^3$ ) for 1.**

| Atom | <i>x</i>  | <i>y</i>  | <i>z</i>   | U(eq)     |
|------|-----------|-----------|------------|-----------|
| H10  | 2950 (3)  | 4563 (2)  | 604 (4)    | 60.6 (9)  |
| H8   | 5182 (3)  | 3088 (2)  | -1459 (3)  | 61.4 (9)  |
| H7   | 6498 (3)  | 3109 (2)  | 1129 (4)   | 61.9 (9)  |
| H11  | 4257 (3)  | 4571 (2)  | 3189 (3)   | 59.2 (9)  |
| H5   | 7600 (3)  | 3924 (2)  | 3050 (4)   | 65.2 (9)  |
| H12a | 4000 (3)  | 3762 (3)  | -3955 (3)  | 65.8 (9)  |
| H12b | 3636 (3)  | 2746 (3)  | -3383 (3)  | 65.8 (9)  |
| H13a | 2517 (7)  | 3170 (20) | -6081 (10) | 98.2 (14) |
| H13b | 1739 (10) | 3026 (17) | -4775 (16) | 98.2 (14) |
| H13c | 2053 (15) | 4071 (4)  | -5260 (30) | 98.2 (14) |
| H2   | 10861 (3) | 3825 (3)  | 7811 (4)   | 77.0 (11) |
| H3   | 9748 (3)  | 3900 (3)  | 4854 (4)   | 75.1 (11) |

**Table S5****Fractional Atomic Coordinates ( $\times 10^4$ ) and Equivalent Isotropic Displacement Parameters ( $\text{\AA}^2\times 10^3$ ) for 2.  $U_{\text{eq}}$  is defined as 1/3 of the trace of the orthogonalised  $U_{ij}$  tensor.**

| Atom | <i>x</i>   | <i>y</i>   | <i>z</i>   | U(eq)      |
|------|------------|------------|------------|------------|
| I2   | 9672.2 (4) | 6393.7 (3) | 2935.6 (3) | 62.67 (13) |
| I1   | 6466.6 (5) | 9050.3 (3) | 5505.1 (3) | 64.69 (14) |
| O1   | 5832 (4)   | 6734 (3)   | 6290 (3)   | 62.5 (10)  |
| N1   | 5963 (4)   | 4669 (3)   | 6481 (3)   | 48.9 (9)   |
| N2   | 3662 (5)   | 2914 (4)   | 9109 (4)   | 63.7 (12)  |
| O3   | 3839 (6)   | 3645 (4)   | 9749 (4)   | 90.8 (15)  |
| O2   | 2896 (5)   | 2158 (4)   | 9183 (4)   | 89.6 (15)  |
| C1   | 6675 (5)   | 6641 (4)   | 5586 (4)   | 46.3 (10)  |
| C6   | 7146 (5)   | 5637 (4)   | 5310 (4)   | 43.8 (9)   |
| C2   | 7126 (5)   | 7553 (4)   | 5115 (4)   | 46.9 (10)  |
| C7   | 6731 (5)   | 4671 (4)   | 5775 (4)   | 48.2 (11)  |
| C3   | 7979 (5)   | 7472 (4)   | 4376 (4)   | 47.9 (11)  |
| C5   | 8021 (5)   | 5570 (4)   | 4570 (4)   | 47.2 (10)  |
| C8   | 5586 (5)   | 3724 (4)   | 6965 (4)   | 46.0 (10)  |
| C13  | 4767 (5)   | 3836 (4)   | 7754 (4)   | 45.0 (10)  |
| C12  | 4451 (5)   | 2901 (4)   | 8234 (4)   | 48.3 (11)  |
| C4   | 8433 (5)   | 6478 (4)   | 4098 (4)   | 46.6 (10)  |
| C14  | 4275 (6)   | 4921 (4)   | 8004 (5)   | 59.4 (13)  |
| C11  | 4871 (6)   | 1904 (4)   | 7965 (4)   | 56.5 (13)  |
| C9   | 6038 (6)   | 2710 (4)   | 6717 (5)   | 58.1 (13)  |
| C10  | 5678 (6)   | 1820 (4)   | 7214 (5)   | 60.6 (14)  |



**Table S6**

**Anisotropic Displacement Parameters ( $\text{\AA}^2 \times 10^3$ ) for 2. The Anisotropic displacement factor exponent takes the form:  $-2\pi^2[h^2a^{*2}U_{11}+2hka^*b^*U_{12}+\dots]$ .**

| Atom | $U_{11}$ | $U_{22}$   | $U_{33}$ | $U_{23}$   | $U_{13}$   | $U_{12}$   |
|------|----------|------------|----------|------------|------------|------------|
| I2   | 67.2 (2) | 65.1 (2)   | 64.9 (2) | 9.46 (17)  | 35.23 (18) | 5.70 (17)  |
| I1   | 84.5 (3) | 39.02 (16) | 74.9 (3) | -1.87 (15) | 26.4 (2)   | 11.05 (16) |
| O1   | 74 (2)   | 49.4 (19)  | 77 (3)   | -0.2 (18)  | 47 (2)     | 7.2 (18)   |
| N1   | 59 (2)   | 36.0 (18)  | 57 (2)   | -1.0 (16)  | 23 (2)     | -3.1 (17)  |
| N2   | 73 (3)   | 62 (3)     | 60 (3)   | 18 (2)     | 23 (2)     | 2 (2)      |
| O3   | 128 (4)  | 87 (3)     | 69 (3)   | -4 (3)     | 48 (3)     | -6 (3)     |
| O2   | 99 (4)   | 76 (3)     | 106 (4)  | 26 (3)     | 51 (3)     | -11 (3)    |
| C1   | 46 (2)   | 43 (2)     | 51 (3)   | -1.4 (19)  | 16 (2)     | 4.3 (19)   |
| C6   | 46 (2)   | 40 (2)     | 48 (3)   | 1.5 (18)   | 15.2 (19)  | 1.4 (18)   |
| C2   | 49 (3)   | 37 (2)     | 55 (3)   | 2.8 (19)   | 13 (2)     | 6.3 (18)   |
| C7   | 52 (3)   | 43 (2)     | 53 (3)   | -1.9 (19)  | 18 (2)     | 2.1 (19)   |
| C3   | 48 (3)   | 42 (2)     | 55 (3)   | 7 (2)      | 13 (2)     | 0.1 (19)   |
| C5   | 57 (3)   | 38 (2)     | 51 (3)   | 2.9 (19)   | 21 (2)     | 7 (2)      |
| C8   | 53 (3)   | 37 (2)     | 49 (3)   | 1.6 (19)   | 11 (2)     | -1.4 (19)  |
| C13  | 49 (2)   | 41 (2)     | 46 (2)   | -1.5 (18)  | 11 (2)     | -3.3 (18)  |
| C12  | 56 (3)   | 44 (2)     | 44 (2)   | 5.7 (19)   | 8 (2)      | -1 (2)     |
| C4   | 52 (3)   | 48 (2)     | 45 (2)   | 5.8 (19)   | 20 (2)     | 4 (2)      |
| C14  | 76 (4)   | 43 (2)     | 67 (3)   | -4 (2)     | 33 (3)     | -2 (2)     |
| C11  | 73 (3)   | 40 (2)     | 57 (3)   | 12 (2)     | 13 (3)     | -5 (2)     |
| C9   | 76 (4)   | 42 (2)     | 62 (3)   | 1 (2)      | 29 (3)     | 3 (2)      |
| C10  | 85 (4)   | 36 (2)     | 62 (3)   | 3 (2)      | 18 (3)     | 2 (2)      |

**Table S7****Torsion Angles for 2.**

| A  | B   | C   | D   | Angle/°    | A   | B   | C   | D   | Angle/°    |
|----|-----|-----|-----|------------|-----|-----|-----|-----|------------|
| I1 | C2  | C3  | C4  | -179.8 (4) | C2  | C1  | C6  | C7  | 179.4 (5)  |
| O1 | C1  | C6  | C7  | 0.2 (8)    | C2  | C1  | C6  | C5  | -1.1 (7)   |
| O1 | C1  | C6  | C5  | 179.8 (5)  | C2  | C3  | C4  | I2  | 178.0 (4)  |
| O1 | C1  | C2  | I1  | -0.5 (7)   | C2  | C3  | C4  | C5  | -0.1 (8)   |
| O1 | C1  | C2  | C3  | -179.1 (5) | C7  | N1  | C8  | C13 | 178.3 (5)  |
| N1 | C8  | C13 | C12 | -178.1 (4) | C7  | N1  | C8  | C9  | 0.7 (8)    |
| N1 | C8  | C13 | C14 | 3.0 (7)    | C7  | C6  | C5  | C4  | 179.4 (5)  |
| N1 | C8  | C9  | C10 | 178.7 (5)  | C5  | C6  | C7  | N1  | 178.0 (5)  |
| N2 | C12 | C11 | C10 | -175.9 (5) | C8  | N1  | C7  | C6  | -178.0 (5) |
| O3 | N2  | C12 | C13 | -35.1 (8)  | C8  | C13 | C12 | N2  | 176.9 (5)  |
| O3 | N2  | C12 | C11 | 143.1 (6)  | C8  | C13 | C12 | C11 | -1.2 (8)   |
| O2 | N2  | C12 | C13 | 147.9 (5)  | C8  | C9  | C10 | C11 | -0.1 (10)  |
| O2 | N2  | C12 | C11 | -33.9 (7)  | C13 | C8  | C9  | C10 | 1.1 (9)    |
| C1 | C6  | C7  | N1  | -2.4 (8)   | C13 | C12 | C11 | C10 | 2.2 (9)    |
| C1 | C6  | C5  | C4  | -0.2 (8)   | C12 | C11 | C10 | C9  | -1.5 (9)   |
| C1 | C2  | C3  | C4  | -1.2 (8)   | C14 | C13 | C12 | N2  | -4.4 (8)   |
| C6 | C1  | C2  | I1  | -179.6 (4) | C14 | C13 | C12 | C11 | 177.6 (5)  |
| C6 | C1  | C2  | C3  | 1.8 (8)    | C9  | C8  | C13 | C12 | -0.5 (7)   |
| C6 | C5  | C4  | I2  | -177.3 (4) | C9  | C8  | C13 | C14 | -179.3 (5) |
| C6 | C5  | C4  | C3  | 0.7 (8)    |     |     |     |     |            |

**Table S8****Hydrogen Atom Coordinates ( $\text{\AA} \times 10^4$ ) and Isotropic Displacement Parameters ( $\text{\AA}^2 \times 10^3$ ) for 2.**

| Atom | x       | y       | z       | U(eq) |
|------|---------|---------|---------|-------|
| H1   | 5663.52 | 5266.51 | 6669.09 | 59    |
| H7   | 7032.23 | 4024.16 | 5554.21 | 58    |
| H3   | 8251.29 | 8083.34 | 4064.49 | 57    |
| H5   | 8329.2  | 4908.91 | 4392.6  | 57    |
| H14A | 5010.95 | 5287.45 | 8470.88 | 89    |
| H14B | 3497.74 | 4850.36 | 8347.85 | 89    |
| H14C | 4003.56 | 5317.13 | 7354.61 | 89    |
| H11  | 4607.19 | 1299    | 8292.12 | 68    |
| H9   | 6588.44 | 2644.56 | 6208.62 | 70    |
| H10  | 5983.94 | 1156.37 | 7040.57 | 73    |

**Table S9**

**Hydrogen Bonds for 2.**

| D  | H  | A               | d(D-H)/Å | d(H-A)/Å | d(D-A)/Å  | D-H-A/° |
|----|----|-----------------|----------|----------|-----------|---------|
| N1 | H1 | O1              | 0.86     | 1.93     | 2.612 (5) | 135.9   |
| N1 | H1 | O1              | 0.86     | 1.93     | 2.612 (5) | 135.9   |
| C7 | H7 | O2 <sup>1</sup> | 0.93     | 2.57     | 3.419 (6) | 152.1   |
| C5 | H5 | O2 <sup>1</sup> | 0.93     | 2.64     | 3.469 (7) | 148.5   |

<sup>1</sup>1/2+X,1/2-Y,-1/2+Z

**Figure S9: Crystal Packing of Compound 1**

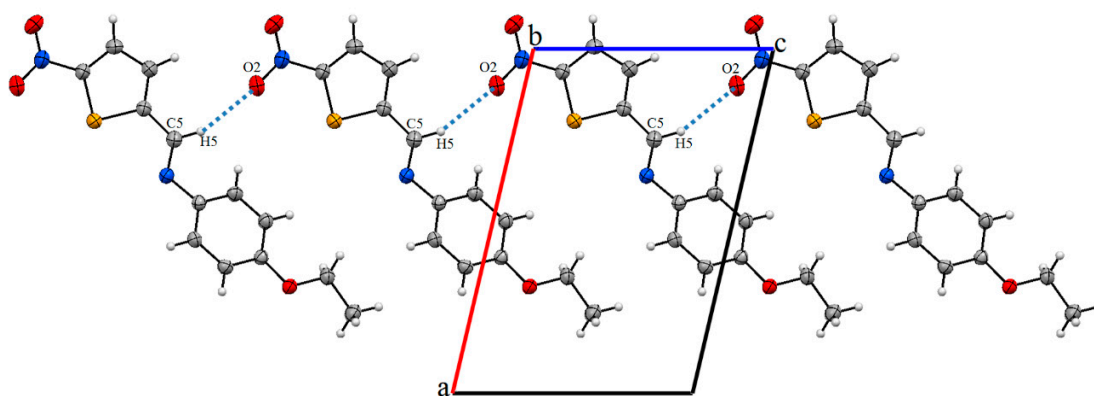

Figure S10: Crystal Packing of Compound 2

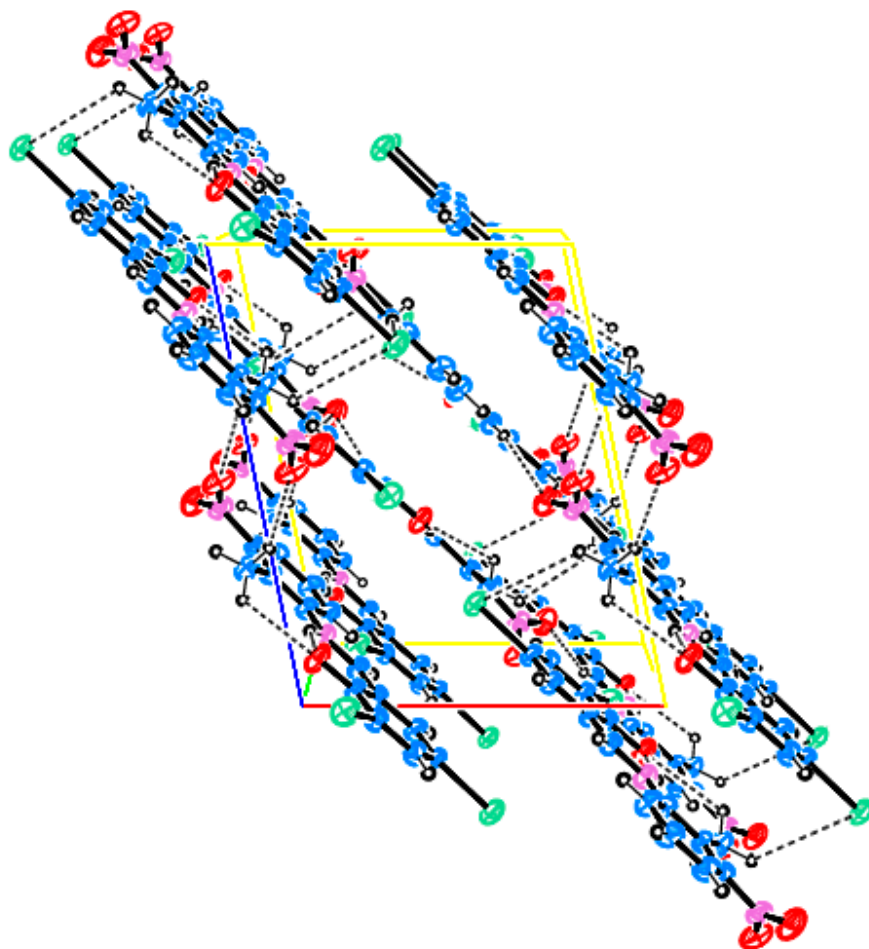

**Table S10****Bond Lengths Compound 1**

| Atom | Atom | Length/Å |         | Atom | Atom | Length/Å |         |
|------|------|----------|---------|------|------|----------|---------|
|      |      | XRD      | DFT     |      |      | XRD      | DFT     |
| S1   | C4   | 1.721(3) | 1.73812 | C9   | C8   | 1.376(4) | 1.39778 |
| S1   | C1   | 1.706(3) | 1.73235 | C6   | C7   | 1.396(4) | 1.39914 |
| O3   | C9   | 1.370(3) | 1.35867 | C6   | C11  | 1.383(4) | 1.40395 |
| O3   | C12  | 1.438(3) | 1.43116 | C10  | C11  | 1.378(4) | 1.37969 |
| N2   | C6   | 1.420(4) | 1.39937 | C8   | C7   | 1.384(4) | 1.38961 |
| N2   | C5   | 1.259(4) | 1.27759 | C5   | C4   | 1.457(4) | 1.44495 |
| O2   | N1   | 1.212(4) | 1.22870 | C4   | C3   | 1.353(5) | 1.38220 |
| N1   | O1   | 1.216(4) | 1.23101 | C12  | C13  | 1.499(4) | 1.51413 |
| N1   | C1   | 1.434(4) | 1.43317 | C1   | C2   | 1.364(5) | 1.36982 |
| C9   | C10  | 1.392(4) | 1.40011 | C2   | C3   | 1.408(4) | 1.40662 |

**Table S11****Bond Angles of Compound 1**

| Atom | Atom | Atom | Angle/°   |           | Atom | Atom | Atom | Angle/°  |           |
|------|------|------|-----------|-----------|------|------|------|----------|-----------|
|      |      |      | XRD       | DFT       |      |      |      | XRD      | DFT       |
| C1   | S1   | C4   | 89.24(14) | 89.56136  | C7   | C8   | C9   | 119.9(3) | 119.89418 |
| C12  | O3   | C9   | 116.4(2)  | 119.07134 | C8   | C7   | C6   | 120.9(3) | 121.15071 |
| C5   | N2   | C6   | 117.6(3)  | 121.90917 | C10  | C11  | C6   | 120.9(3) | 119.39443 |
| O1   | N1   | O2   | 123.9(3)  | 125.12738 | C4   | C5   | N2   | 122.9(3) | 121.54416 |
| C1   | N1   | O2   | 118.6(3)  | 117.69641 | C5   | C4   | S1   | 121.0(2) | 121.32121 |
| C1   | N1   | O1   | 117.5(3)  | 117.17621 | C3   | C4   | S1   | 112.7(2) | 112.10314 |
| C10  | C9   | O3   | 116.0(3)  | 115.91614 | C3   | C4   | C5   | 126.3(3) | 126.57561 |
| C8   | C9   | O3   | 124.4(3)  | 124.68193 | C13  | C12  | O3   | 108.4(3) | 107.73185 |
| C8   | C9   | C10  | 119.6(3)  | 119.39443 | N1   | C1   | S1   | 119.7(2) | 120.12208 |
| C7   | C6   | N2   | 122.5(3)  | 124.63403 | C2   | C1   | S1   | 114.9(2) | 114.02110 |
| C11  | C6   | N2   | 119.1(3)  | 117.14736 | C2   | C1   | N1   | 125.4(3) | 125.85681 |
| C11  | C6   | C7   | 118.3(3)  | 118.18184 | C3   | C2   | C1   | 109.7(3) | 111.12436 |
| C11  | C10  | C9   | 120.2(3)  | 121.06833 | C2   | C3   | C4   | 113.5(3) | 113.18981 |

**Table S12****Bond Lengths of Compound 2**

| Atom | Atom | Length/Å |         | Atom | Atom | Length/Å |         |
|------|------|----------|---------|------|------|----------|---------|
|      |      | XRD      | DFT     |      |      | XRD      | DFT     |
| I2   | C4   | 2.105(5) | 2.14869 | C6   | C5   | 1.404(6) | 1.40695 |
| I1   | C2   | 2.087(5) | 2.13744 | C2   | C3   | 1.387(7) | 1.38527 |
| O1   | C1   | 1.345(6) | 1.34383 | C3   | C4   | 1.398(7) | 1.40487 |
| N1   | C7   | 1.288(6) | 1.30218 | C5   | C4   | 1.391(7) | 1.38084 |
| N1   | C8   | 1.424(6) | 1.41775 | C8   | C13  | 1.418(7) | 1.41913 |
| N2   | O3   | 1.220(7) | 1.28507 | C8   | C9   | 1.408(7) | 1.40151 |
| N2   | O2   | 1.230(6) | 1.28297 | C13  | C12  | 1.390(7) | 1.40460 |
| N2   | C12  | 1.484(7) | 1.47362 | C13  | C14  | 1.505(7) | 1.51441 |
| C1   | C6   | 1.415(6) | 1.42757 | C12  | C11  | 1.387(7) | 1.39602 |
| C1   | C2   | 1.409(7) | 1.40793 | C11  | C10  | 1.367(8) | 1.38597 |
| C6   | C7   | 1.447(6) | 1.44395 | C9   | C10  | 1.369(7) | 1.39217 |

**Table S13****Bond Angles of Compound 2**

| Atom | Atom | Atom | Angle/°  |           | Atom | Atom | Atom | Angle/°  |           |
|------|------|------|----------|-----------|------|------|------|----------|-----------|
|      |      |      | XRD      | DFT       |      |      |      | XRD      | DFT       |
| C7   | N1   | C8   | 123.2(4) | 123.06302 | C13  | C8   | N1   | 117.4(4) | 118.38028 |
| O3   | N2   | O2   | 122.6(5) | 124.25984 | C9   | C8   | N1   | 122.5(4) | 120.77215 |
| O3   | N2   | C12  | 119.2(5) | 118.71172 | C9   | C8   | C13  | 120.0(4) | 120.82942 |
| O2   | N2   | C12  | 118.1(5) | 117.02842 | C8   | C13  | C14  | 119.6(4) | 119.46093 |
| O1   | C1   | C6   | 121.4(4) | 121.22843 | C12  | C13  | C8   | 116.0(4) | 116.61137 |
| O1   | C1   | C2   | 120.3(4) | 121.01701 | C12  | C13  | C14  | 124.3(4) | 123.92213 |
| C2   | C1   | C6   | 118.3(4) | 117.75446 | C13  | C12  | N2   | 121.4(5) | 122.39183 |
| C1   | C6   | C7   | 120.9(4) | 119.21050 | C11  | C12  | N2   | 115.1(4) | 115.24695 |
| C5   | C6   | C1   | 119.8(4) | 120.53955 | C11  | C12  | C13  | 123.5(5) | 122.36113 |
| C5   | C6   | C7   | 119.2(4) | 120.24290 | C3   | C4   | I2   | 119.0(3) | 119.69337 |
| C1   | C2   | I1   | 119.6(3) | 118.38294 | C5   | C4   | I2   | 121.7(4) | 120.31940 |
| C3   | C2   | I1   | 119.2(3) | 120.53071 | C5   | C4   | C3   | 119.3(4) | 119.98723 |
| C3   | C2   | C1   | 121.2(4) | 121.08621 | C10  | C11  | C12  | 119.2(5) | 120.05136 |
| N1   | C7   | C6   | 122.9(4) | 121.09665 | C10  | C9   | C8   | 121.0(5) | 120.80809 |
| C2   | C3   | C4   | 120.4(4) | 120.51167 | C11  | C10  | C9   | 120.2(5) | 119.33372 |
| C4   | C5   | C6   | 121.0(4) | 120.12063 |      |      |      |          |           |

Table S14

## NBO of the synthesized compounds

| Compounds | Donor (i) | Acceptor (j) | E(2)[Kcal/mol] | E(j)E(i) (a.u) | F(I,J)(a.u) |
|-----------|-----------|--------------|----------------|----------------|-------------|
| 1         | S1-C17    | C28          | 0.51           | 1.38           | 0.024       |
|           | S1-C23    | C17-C28      | 0.55           | 1.33           | 0.024       |
|           | O2-C6     | C6-C9        | 0.58           | 1.48           | 0.026       |
|           | O2-C20    | C24          | 0.59           | 1.45           | 0.026       |
|           | N3-C7     | C-18         | 0.93           | 1.64           | 0.035       |
|           | N3-C18    | C7-C15       | 0.74           | 0.91           | 0.024       |
|           | O4-N5     | C23          | 0.63           | 1.08           | 0.034       |
|           | C6-C11    | C9           | 0.88           | 1.84           | 0.036       |
|           | S1        | C23          | 2.60           | 1.57           | 0.057       |
|           | N3        | C7           | 2.60           | 1.35           | 0.054       |
| 2         | I1-C19    | C12          | 1.77           | 1.73           | 0.050       |
|           | I2-C9     | C17          | 1.12           | 1.49           | 0.037       |
|           | N3-C10    | C8           | 1.42           | 2.18           | 0.050       |
|           | N3-C16    | C10          | 1.87           | 1.78           | 0.051       |
|           | N4-O5     | C18          | 1.17           | 2.21           | 0.046       |
|           | N4-O5     | O6           | 11.87          | 0.17           | 0.074       |
|           | N4-C18    | O6           | 0.52           | 2.77           | 0.034       |
|           | C7-C8     | C9           | 0.53           | 1.83           | 0.028       |
|           | C7-C9     | C8           | 1.87           | 2.02           | 0.055       |
|           | C8-C14    | C19          | 0.72           | 1.82           | 0.033       |

Table S15

Global Reactivity Parameters of the synthesized compounds.

| Compounds | $\chi$ | $\mu$  | $\eta$ | IP      | EA    | $1/2\eta$ | $\omega$ |
|-----------|--------|--------|--------|---------|-------|-----------|----------|
| 1         | 6.344  | -6.344 | 1.950  | 8.294   | 4.395 | 0.256     | 10.319   |
| 2         | 4.510  | -4.510 | 1.658  | 6.11688 | 2.852 | 0.302     | 12.173   |

Figure S11: Correlation of Bond Length between DFT and SCXRD of Compound 1

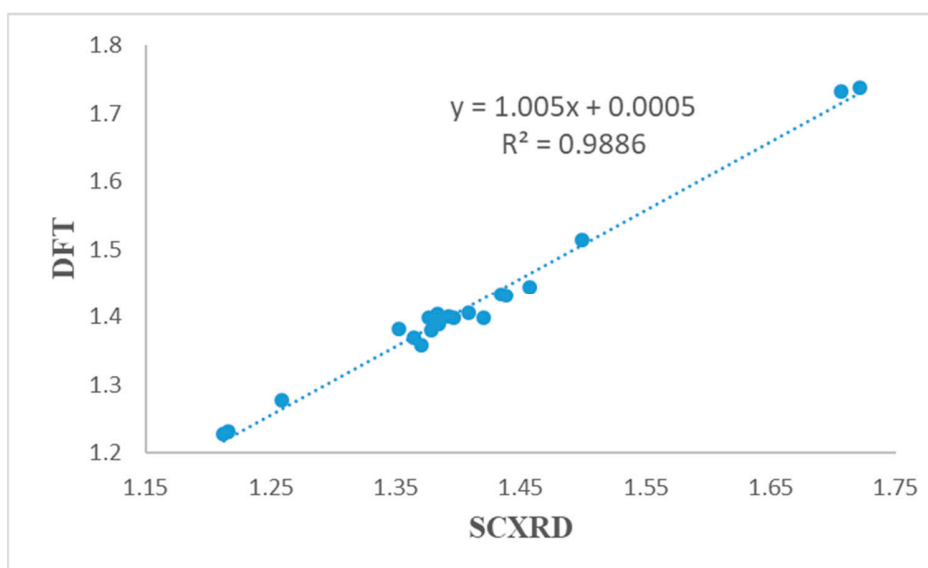

Figure S12: Correlation of Bond Angle between DFT and SCXRD of Compound **1**

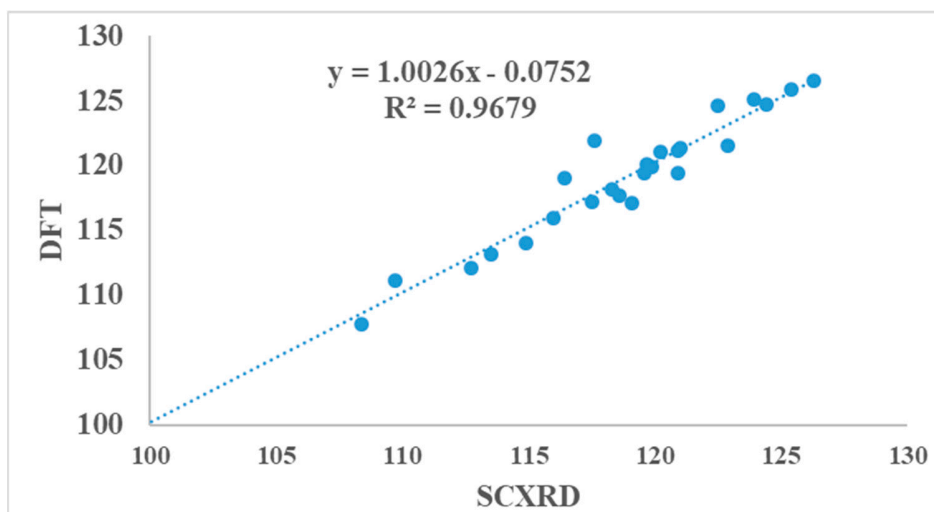

Figure S13: Correlation of Bond Length between DFT and SCXRD of Compound **2**

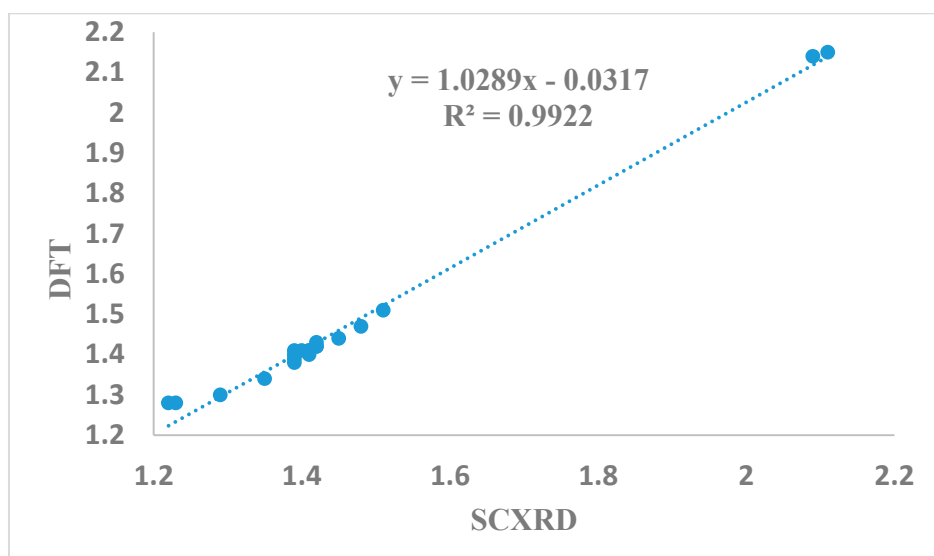



Figure S14: Correlation of Bond Angle between DFT and SCXRD of Compound 2.

(a): Superimposed DFT and SCXRD structure of Compound 1;

(b): Superimposed DFT and SCXRD structure of Compound 2.

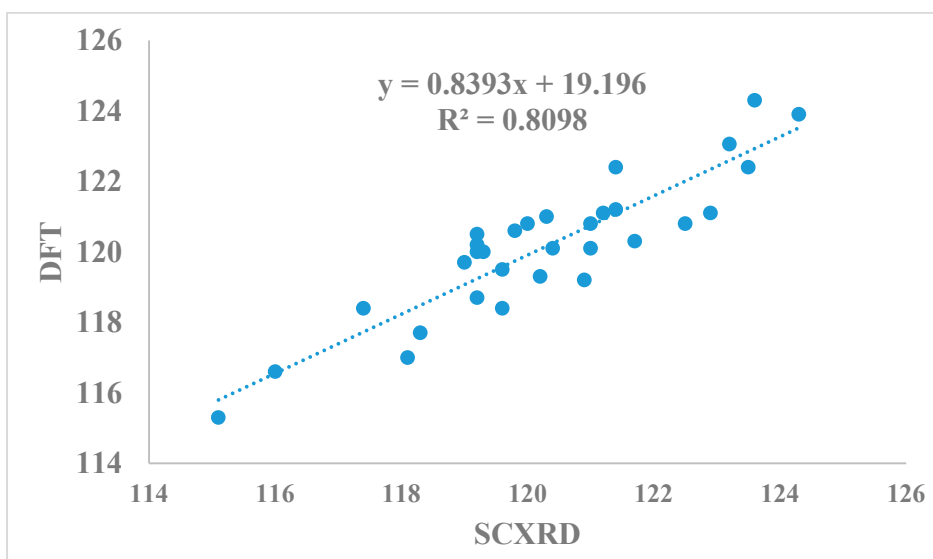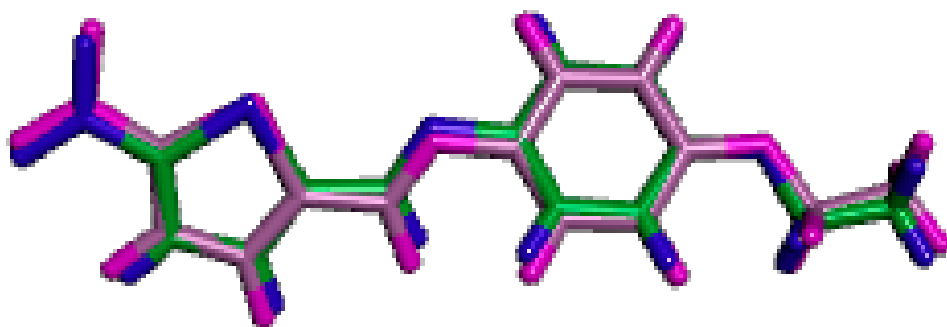

(a)

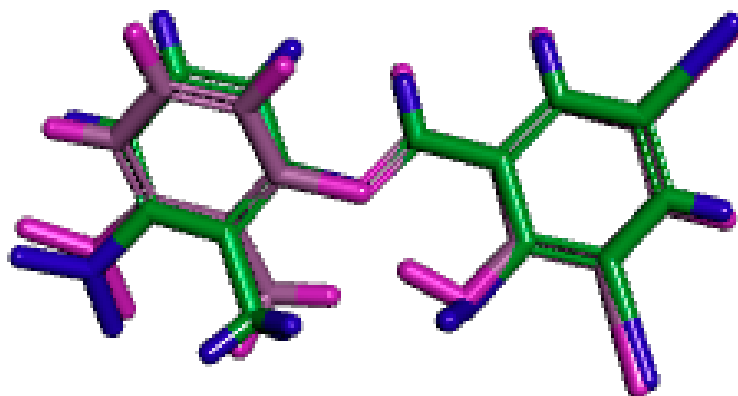

(b)

Figure S15: DOS spectra of the compounds **1** and **2**

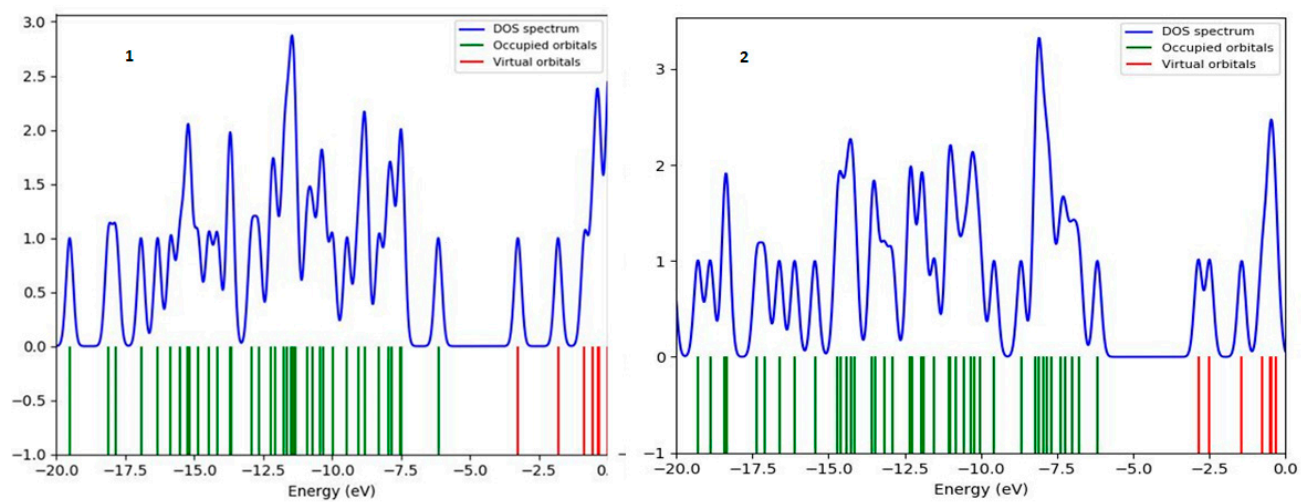

Figure S16: Fingerprint plots of contacts along with relative contributions for **1**

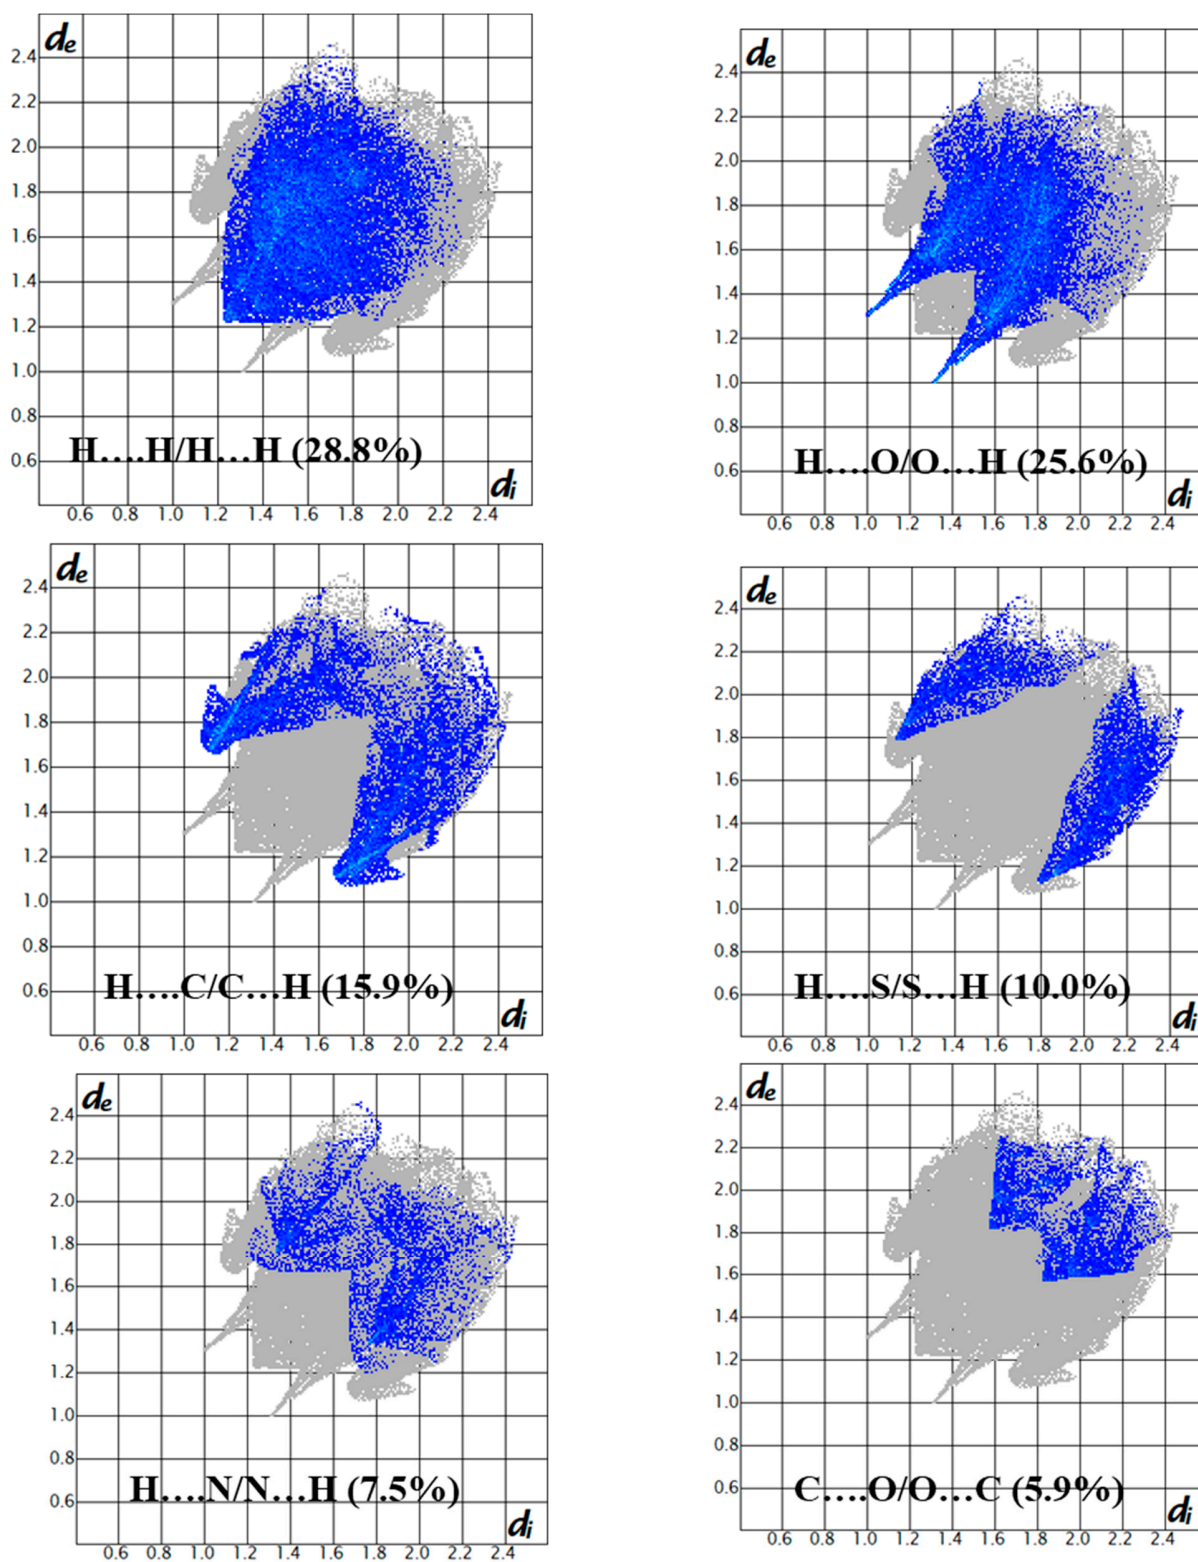

Figure S17: Fingerprint plots of contacts along with relative contributions for **2**

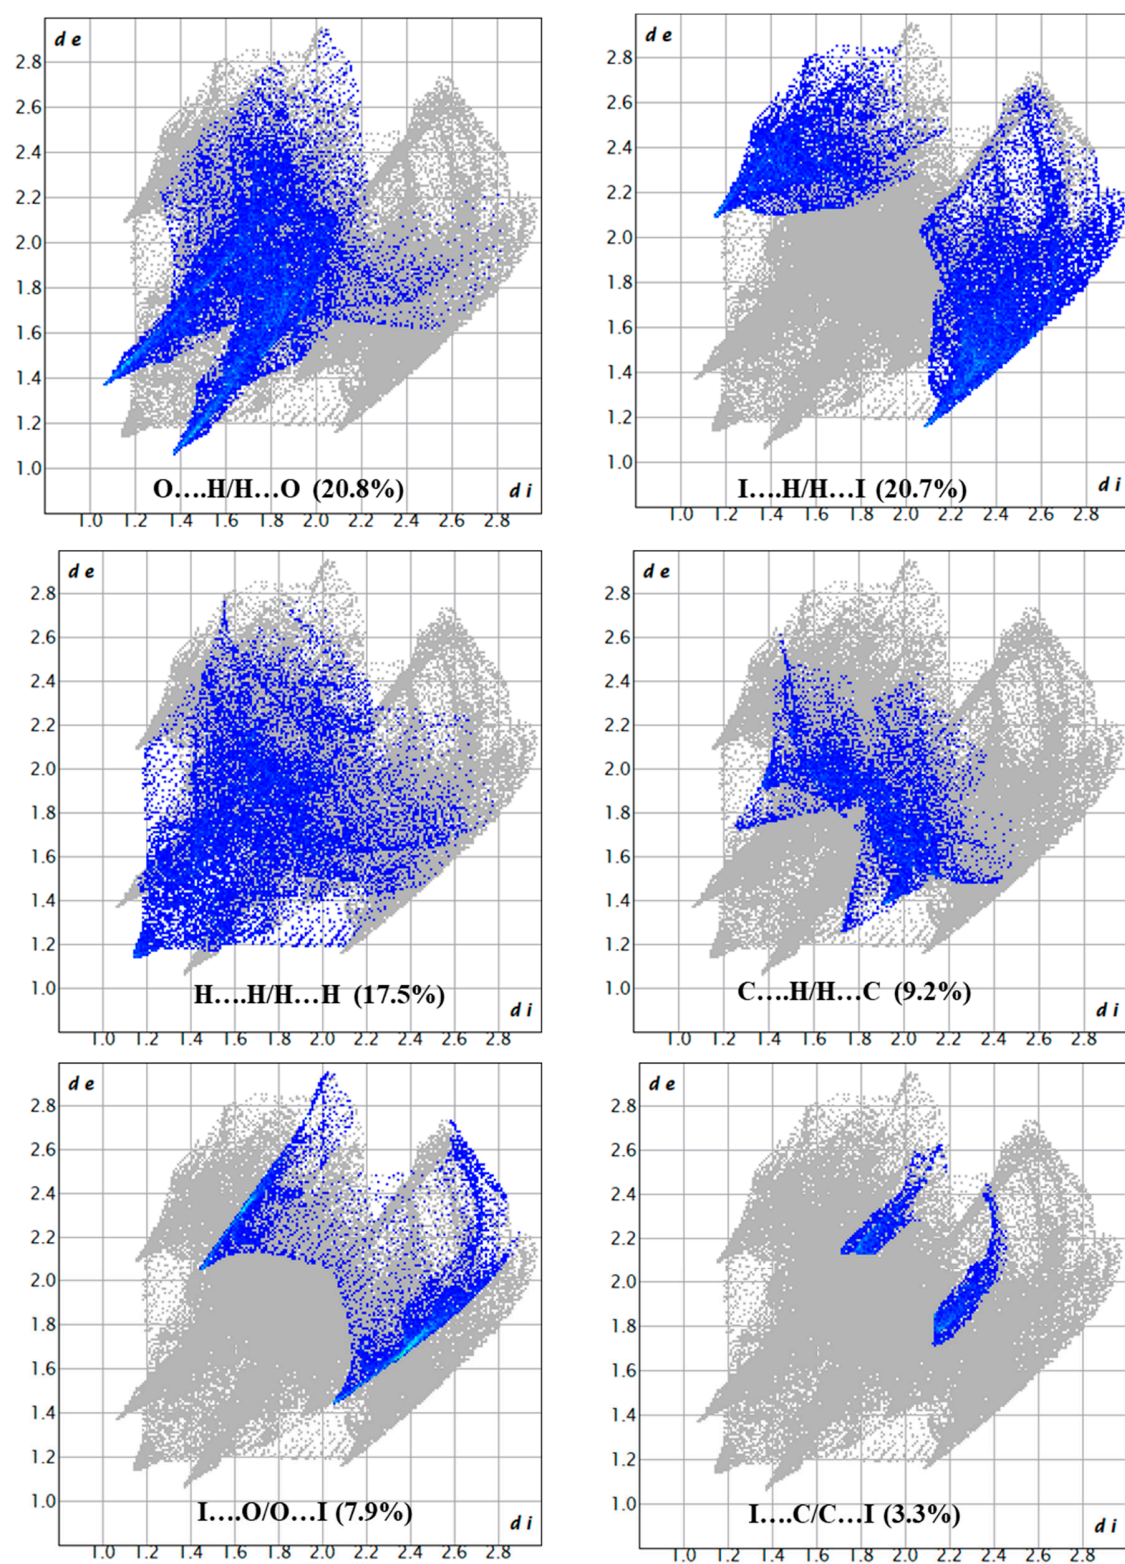

Figure S18: 3D Interactions of Compound **2** on Active Sites of AChE

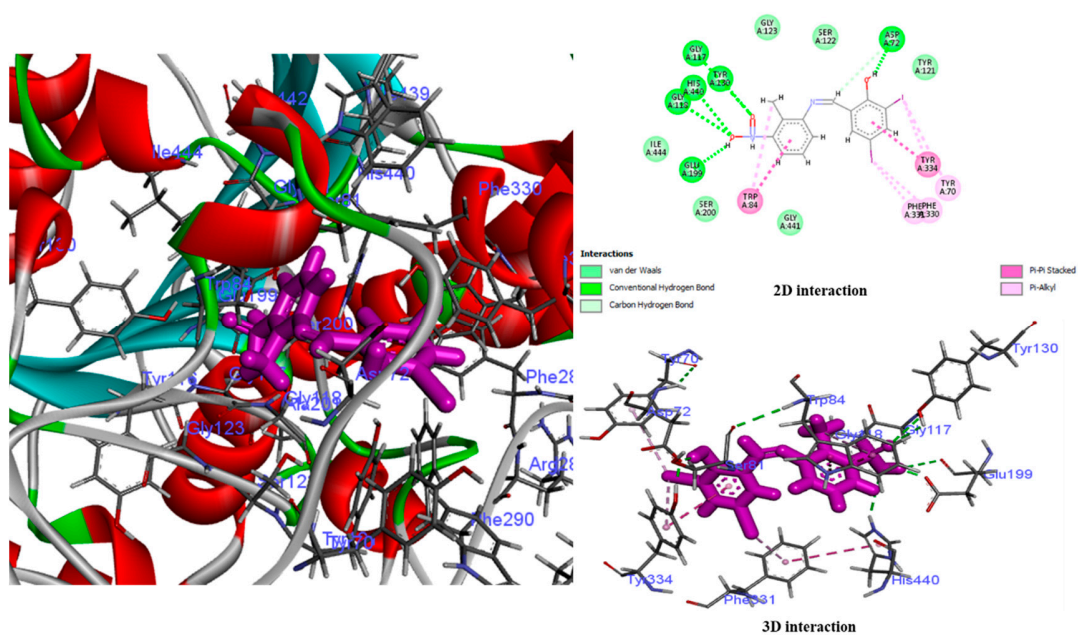

Figure S19: Docking Pose of Compound **1** with BChE

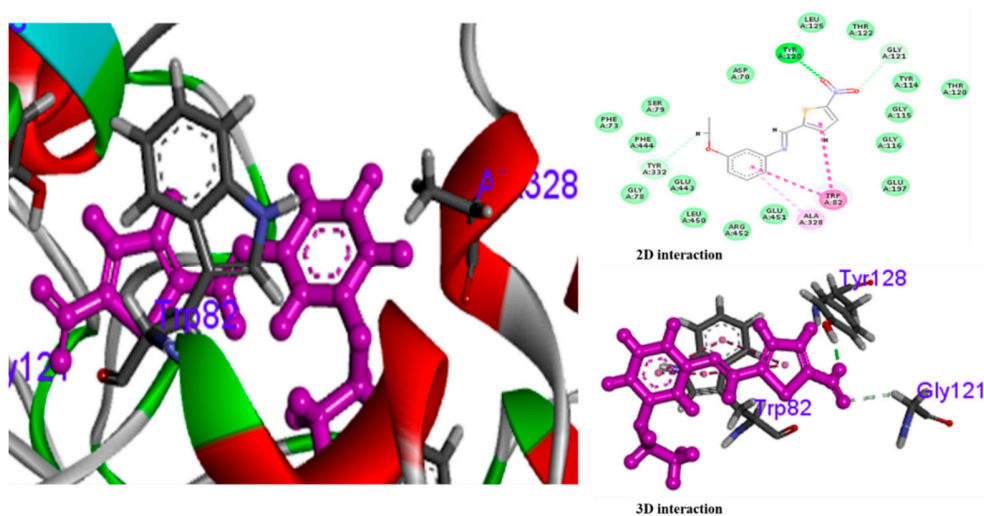



Figure S20: 3D Interactions of Compound **2** on Active Sites of BChE.

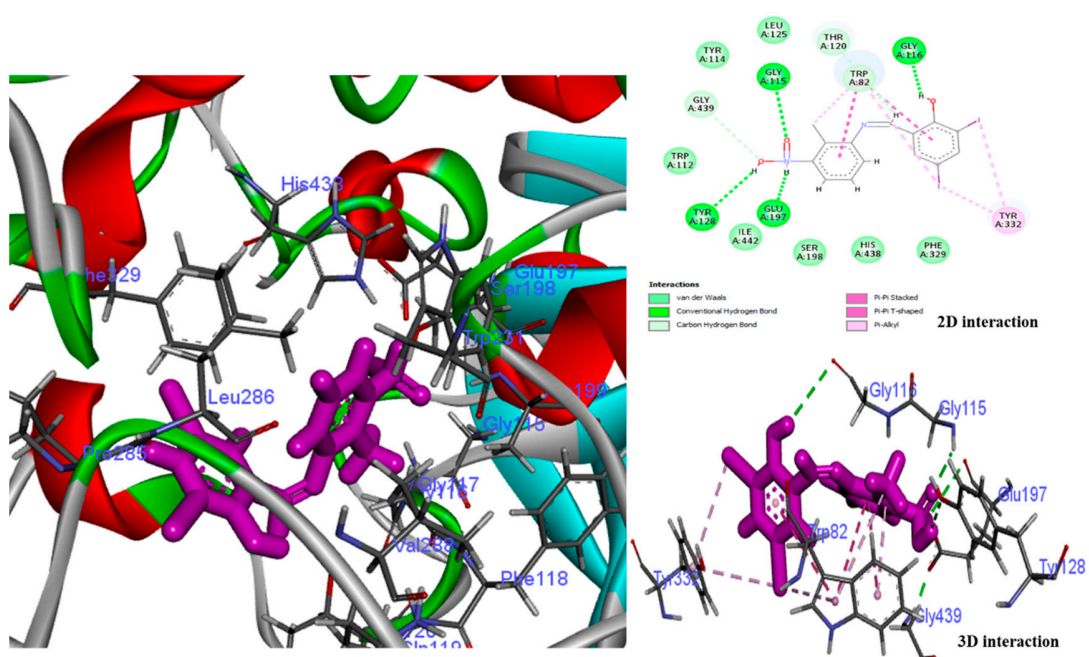

Supplement: s1 [file s1]
